# Supplementary material for: Hollow hydroxyapatite/polyelectrolyte hybrid microparticles with controllable size, wall thickness and drug delivery properties
Source: Royal Society of Chemistry journal article supplement (doi:10.1039/c5tb01268f), 2015-01-01
Supplement: c5tb01268f1.pdf [file c5tb01268f1.pdf]

## Electronic supplementary information (ESI):

# Hollow hydroxyapatite/polyelectrolyte hybrid microparticles with controllable size, wall thickness and drug delivery property

Jing Wei, Jun Shi\*, Qiong Wu, Liu Yang and Shaokui Cao\*

### Figure Captions:

Fig. S1 SEM micrographs and corresponding EDX spectra of vaterite  $\text{CaCO}_3$  cores (A1 and A2), 6h-HAP (B1 and B2), 6h-HAP/CHI/HA (C1 and C2) and 6h-HAP/CHI/HA microparticles (D1 and D2). 1 refers to SEM micrograph and 2 refers to EDX spectrum.

Fig. S2  $\text{N}_2$  adsorption/desorption isotherms of 3h-H-HAP microparticles (A) and the corresponding pore size distribution curves (B)

Fig. S3 Plots of  $\ln(M_t/M_\infty)$  versus  $\ln t$  for hybrid microparticles at pH 7.4 and 37 °C (A), and plots of  $\ln(M_t/M_\infty)$  versus  $\ln t$  for hybrid microparticles at pH 2.1 and 37 °C (B).

**Table Captions:**

Table S1 Parameters  $n$ ,  $k$  and  $R^2$  determined by Eq. (1) for the DOX release of hybrid microparticles at different release conditions

| Sample           | Release conditions | $k$   | $n$   | $R^2$ |
|------------------|--------------------|-------|-------|-------|
| 12h-H-HAP        | pH=7.4             | 0.212 | 0.352 | 0.998 |
| 12h-H-HAP/CHI/HA | pH=7.4             | 0.179 | 0.368 | 0.983 |
| 6h-H-HAP/CHI/HA  | pH=7.4             | 0.138 | 0.468 | 0.992 |
| 3h-H-HAP/CHI/HA  | pH=7.4             | 0.098 | 0.489 | 0.958 |
| 12h-H-HAP/CHI/HA | pH=2.1             | 0.619 | 0.152 | 0.908 |
| 6h-H-HAP/CHI/HA  | pH=2.1             | 0.555 | 0.189 | 0.927 |
| 3h-H-HAP/CHI/HA  | pH=2.1             | 0.459 | 0.229 | 0.973 |

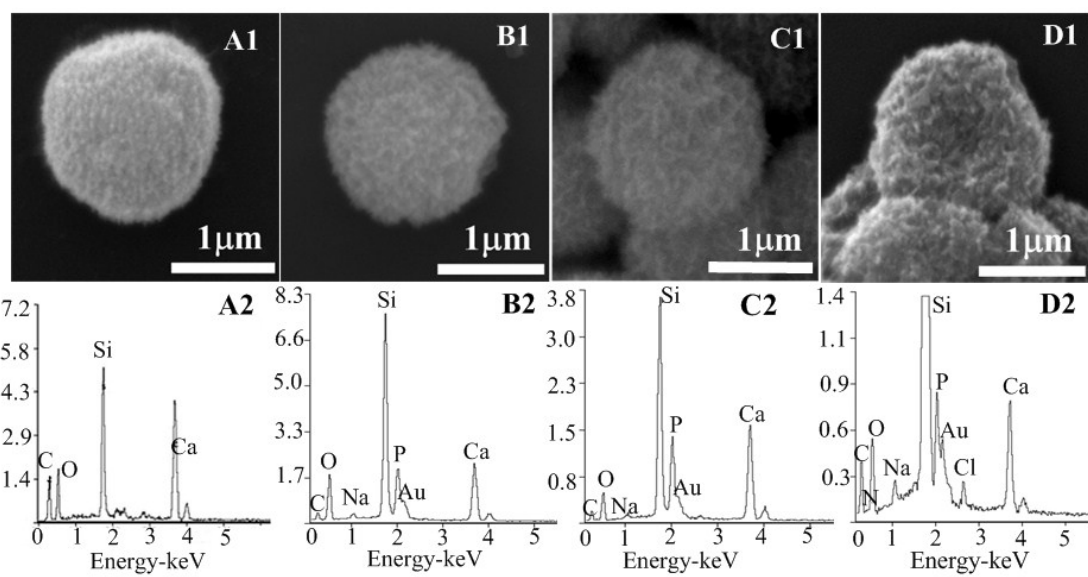

Fig. S1

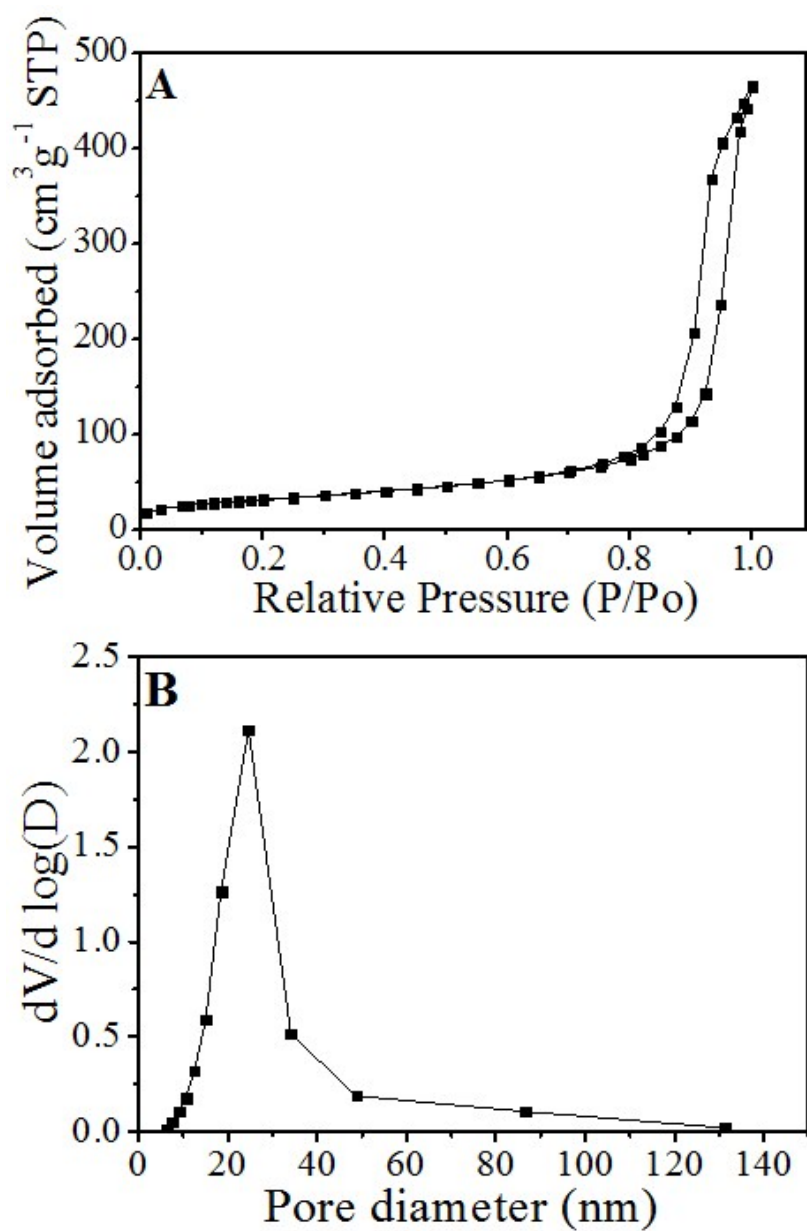

Fig. S2

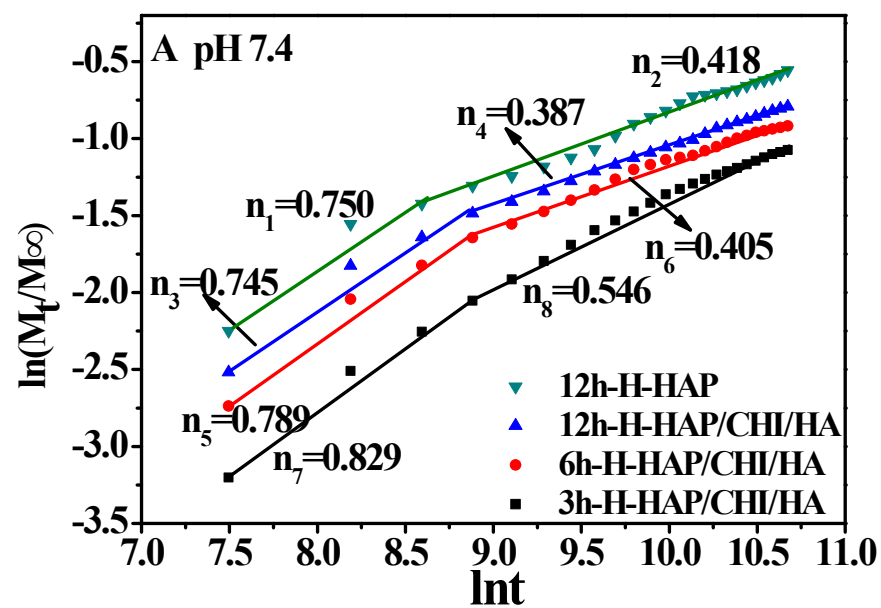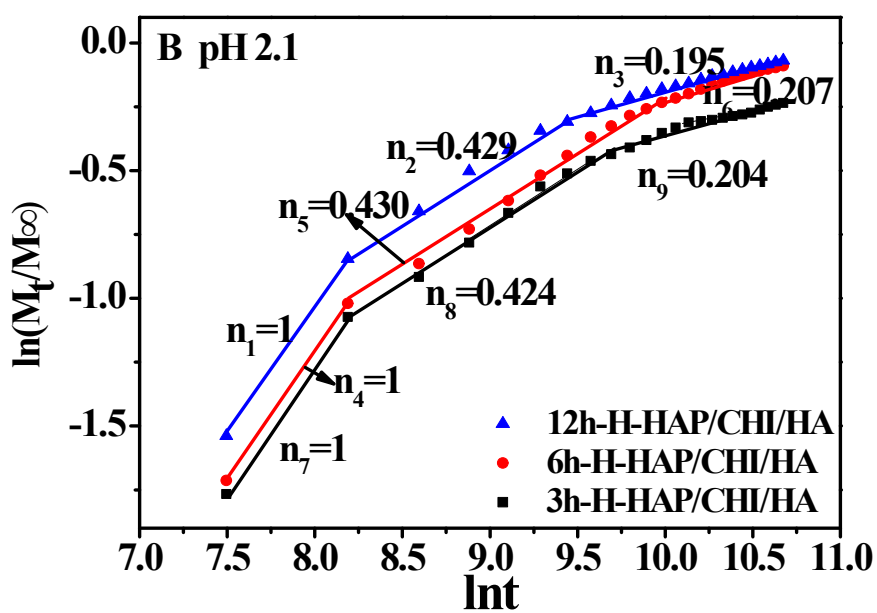

Fig. S3
